# Supplementary material for: Enzymatic polymerization of furan-based polymers in biobased solvents
Source: Royal Society of Chemistry journal article supplement (doi:10.1039/d4su00358f), 2024-01-01
Supplement: d4su00358f1.pdf [file d4su00358f1.pdf]

Supplementary Information

**Enzymatic Polymerization of Furan-Based Polymers in Biobased Solvents**

Fitriia Silvianti <sup>1</sup>, Dina Maniar <sup>1</sup>, Tijn C. de Leeuw <sup>2</sup>, Jur van Dijken <sup>1</sup>, Katja Loos <sup>1,\*</sup>

1 Macromolecular Chemistry & New Polymeric Materials, Zernike Institute for Advanced Materials, University of Groningen, Nijenborgh 4, 9747 AG, Groningen, The Netherlands

2 CarbExplore Research B.V., 9747 AA Groningen, The Netherlands

\* Correspondence: [k.u.loos@rug.nl](mailto:k.u.loos@rug.nl)

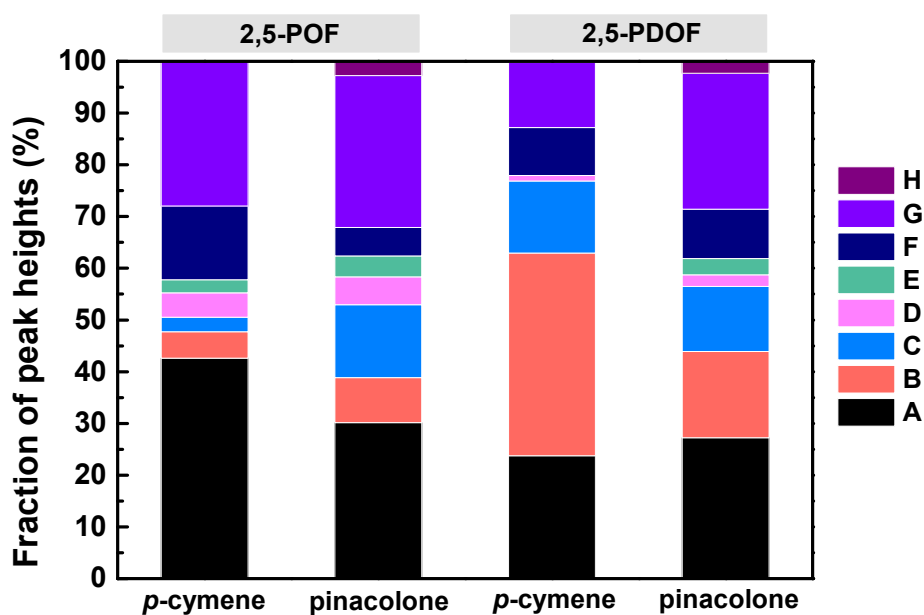

**Figure S1.** The Sum of peak height intensities of furan-based polyesters species from MALDI-ToF MS analysis and details of each species A to H are provided in Table 2.

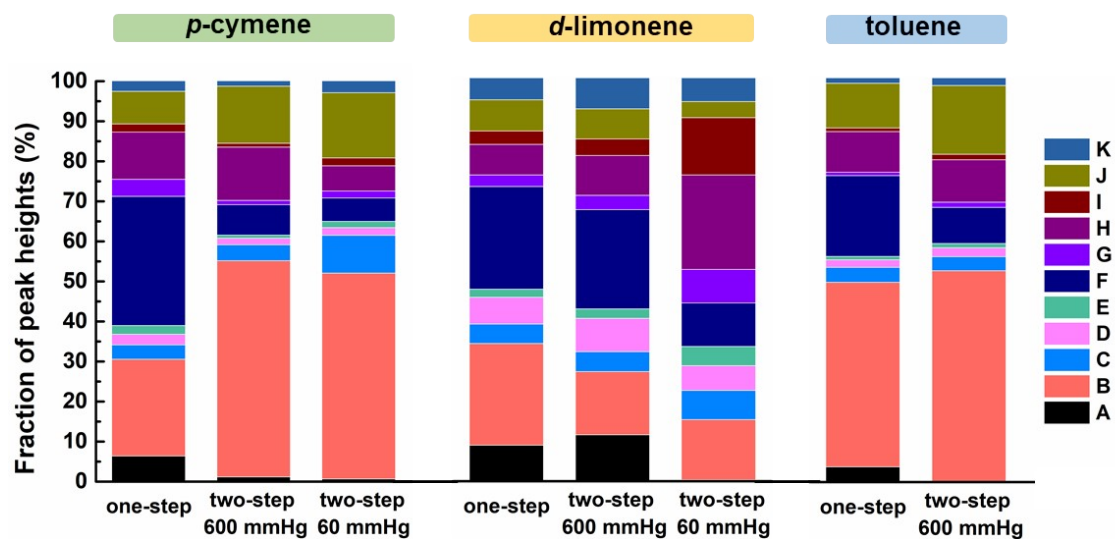

**Figure S2.** The Sum of peak height intensities of P(2,5-FMF-co-2,5-DF) species from MALDI-ToF MS analysis and details of each species A to K are provided in Table 3.

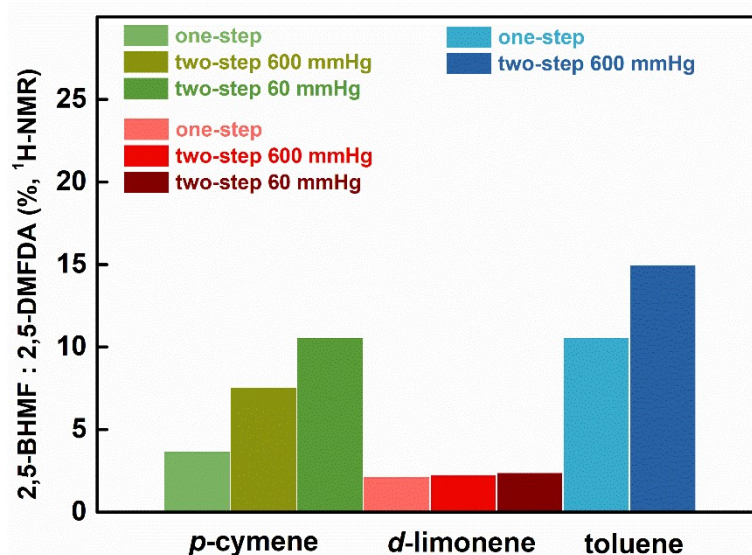

**Figure S3.** The molar fractions percentage of 2,5-BHMF comparison between P(2,5-FMF-*co*-2,5-DF) obtained in various method determined by  $^1\text{H-NMR}$  spectroscopy

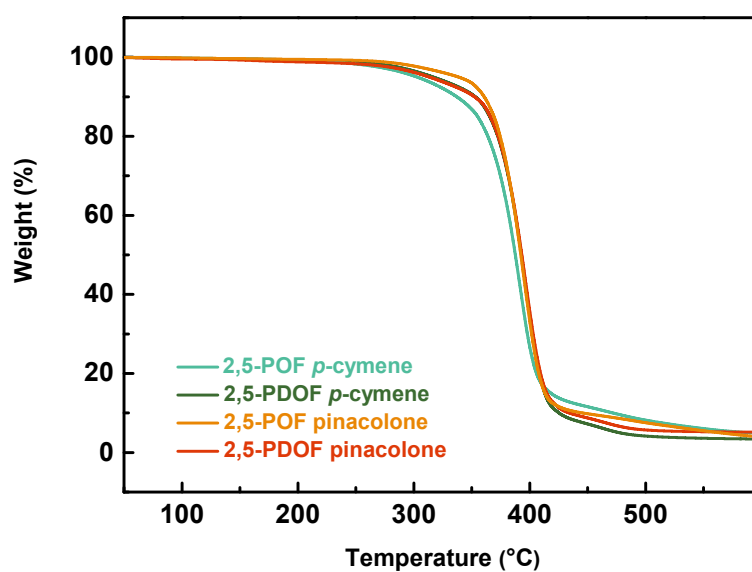

**Figure S4.** TGA curves of the obtained furan-based polyesters

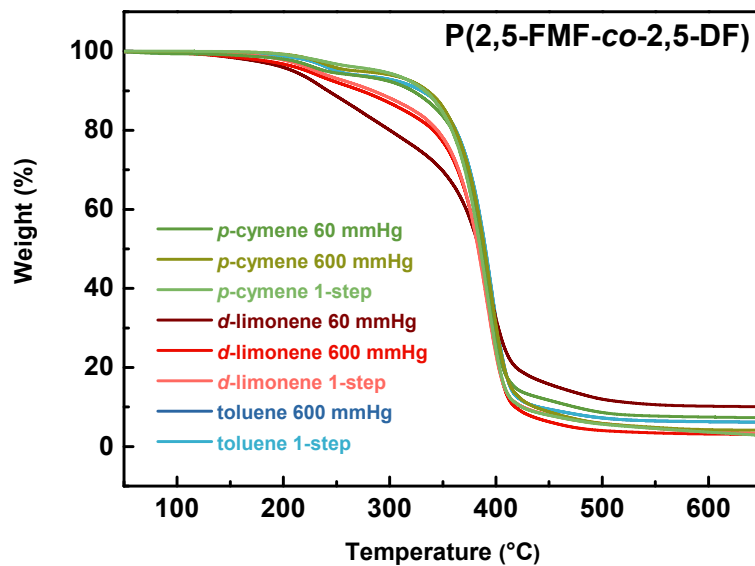

Figure S5. TGA curves of the obtained P(2,5-FMF-co-2,5-DF)

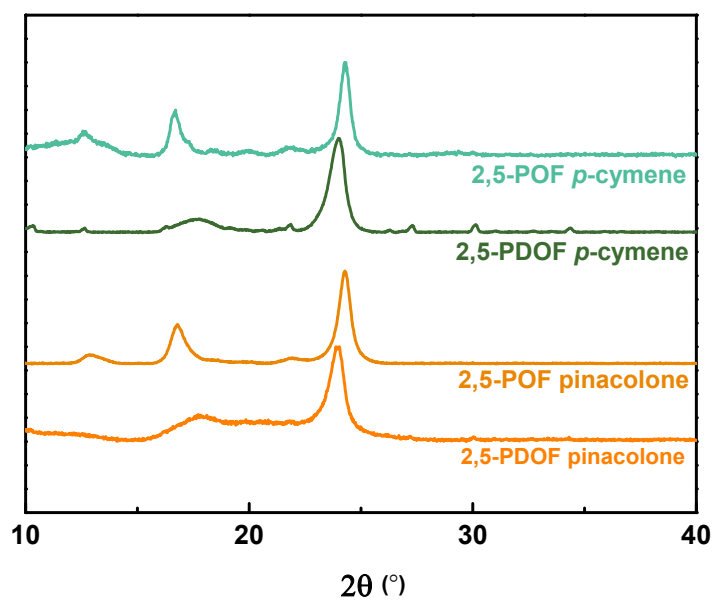

Figure S6. WAXD spectra of the obtained furan-based polyesters

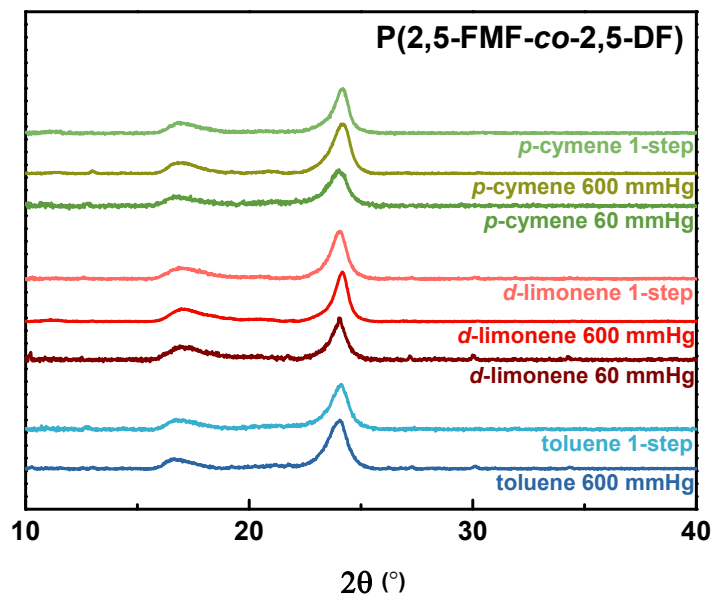

**Figure S7.** WAXD spectra of the obtained P(2,5-FMF-co-2,5-DF)

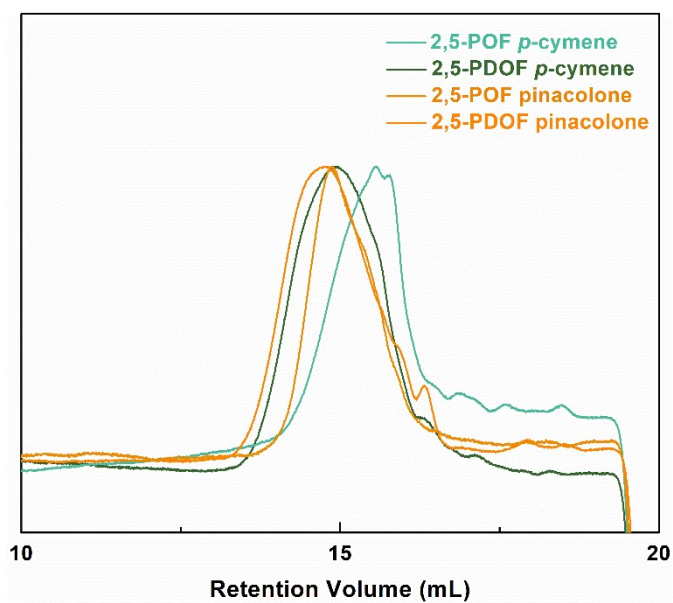

**Figure S8.** SEC elugrams of the obtained furan-based polyesters

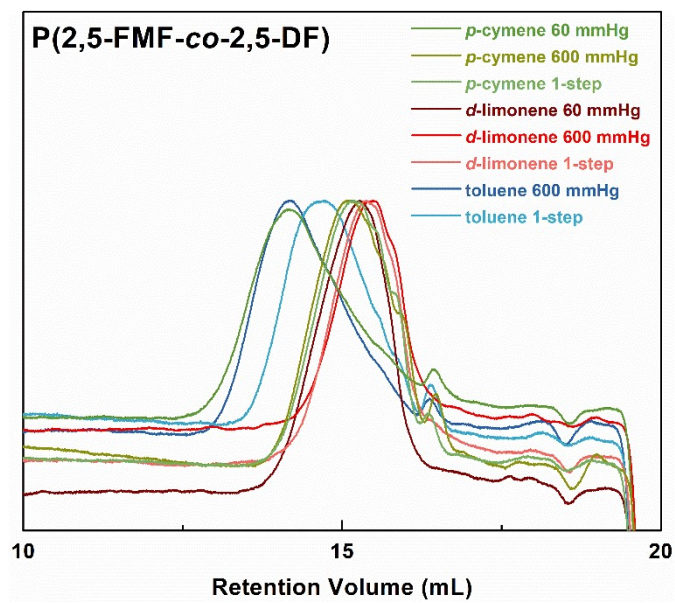

**Figure S9.** SEC elugrams of the obtained P(2,5-FMF-co-2,5-DF)

**Table S1.** Molecular weights and yields of the obtained furan-based polyesters in comparison with previous results.<sup>[14,39]</sup>

| $x^a$ | Polymer  | Solvent             | $\bar{M}_{na}$         | $\bar{M}_{wa}$         | Yield <sup>b</sup> |
|-------|----------|---------------------|------------------------|------------------------|--------------------|
|       |          |                     | [g mol <sup>-1</sup> ] | [g mol <sup>-1</sup> ] | [%]                |
| 8     | 2,5-POF  | <i>p</i> -cymene    | 3350                   | 5000                   | 35                 |
|       |          | Pinacolone          | 2400                   | 4100                   | 17                 |
|       |          | Toluene             | 4450                   | 8200                   | 53                 |
|       |          | BMIMPF <sub>6</sub> | 1550                   | 2000                   | 30                 |
|       |          | U-ChCl              | 1800                   | 2500                   | 35                 |
| 12    | 2,5-PDOF | <i>p</i> -cymene    | 4100                   | 7000                   | 63                 |
|       |          | Pinacolone          | 3700                   | 6200                   | 48                 |
|       |          | Toluene             | 5700                   | 13300                  | 60                 |
|       |          | BMIMPF <sub>6</sub> | 2700                   | 5400                   | 56                 |
|       |          | U-ChCl              | 1900                   | 2700                   | 41                 |

<sup>a</sup> The number-average molecular weight ( $\bar{M}_n$ ) and weight-average molecular weight ( $\bar{M}_w$ ) were determined by SEC using CHCl<sub>3</sub> as the eluent; <sup>b</sup> isolated yield.

**Table S2.** Molecular weights and yields of the obtained P(2,5-FMF-co-2,5-DF)

| Method                 | Solvent            | $\bar{M}_{na}$         | $\bar{M}_{wa}$         | Yield <sup>b</sup> |
|------------------------|--------------------|------------------------|------------------------|--------------------|
|                        |                    | [g mol <sup>-1</sup> ] | [g mol <sup>-1</sup> ] | [%]                |
| One-step               | <i>p</i> -cymene   | 3000                   | 4400                   | 42                 |
|                        | <i>d</i> -limonene | 2400                   | 3500                   | 49                 |
|                        | Toluene            | 4300                   | 7100                   | 48                 |
| Two-step<br>(600 mmHg) | <i>p</i> -cymene   | 3500                   | 5900                   | 47                 |
|                        | <i>d</i> -limonene | 2300                   | 3400                   | 49                 |
|                        | Toluene            | 5800                   | 11400                  | 54                 |
| Two-step<br>(60 mmHg)  | <i>p</i> -cymene   | 5600                   | 12800                  | 61                 |
|                        | <i>d</i> -limonene | 3000                   | 4500                   | 60                 |

<sup>a</sup> The number-average molecular weight ( $\bar{M}_n$ ) and weight-average molecular weight ( $\bar{M}_w$ ) were determined by SEC using CHCl<sub>3</sub> as the eluent; <sup>b</sup> isolated yield.

**Table S3.** Properties of selected solvents

| Solvent            | Kamlet-Taft <sup>a</sup> |         | $V_m^b$<br>(mL/mol) | Log <i>P</i> | References                 |
|--------------------|--------------------------|---------|---------------------|--------------|----------------------------|
|                    | $\beta$                  | $\pi^*$ |                     |              |                            |
| Toluene            | 0.12                     | 0.50    | 107.10              | 2.58         | Clark et al. <sup>44</sup> |
| <i>p</i> -cymene   | 0.13                     | 0.39    | 156.06              | 3.47         | Clark et al. <sup>44</sup> |
| Pinacolone         | 0.58                     | 0.59    | 125.20              | 1.21         | Byrne et al. <sup>33</sup> |
| <i>d</i> -limonene | 0.00                     | 0.16    | 162.17              | 4.57         | Clark et al. <sup>44</sup> |

<sup>a</sup> measured via UV spectroscopy taking the wavelength of maximum absorption,  $\lambda_{max}$ , in the relevant solvent, i.e., hydrogen bond accepting ability ( $\beta$ ) using 4-nitroanisole, polarizability ( $\pi^*$ ) using N,N-diethyl-4-aniline;

<sup>b</sup> molar volume calculated as the ratio between molecular weight ( $M_w$ ) and density ( $\rho$ ) of the solvent

**Table S4.** Thermal and crystalline properties of the obtained furan-based polyesters

| Polyester | Solvent          | DSC             |                 |                 |                 | TGA                   | WAXD       |
|-----------|------------------|-----------------|-----------------|-----------------|-----------------|-----------------------|------------|
|           |                  | $T_g^a$<br>(°C) | $T_m^b$<br>(°C) | $T_m^b$<br>(°C) | $T_c^c$<br>(°C) | $T_{d-max}^d$<br>(°C) | $\chi_c^e$ |
| 2,5-POF   | <i>p</i> -cymene | 10              | 138; 141        | 129; 138        | 118             | 394                   | 56         |
|           | Pinacolone       | 5               | 121; 127        | 116; 126        | 104             | 390                   | 51         |
| 2,5-PDOF  | <i>p</i> -cymene | 5               | 57; 102         | 94; 102         | 79              | 396                   | 46         |
|           | Pinacolone       | 6               | 55; 100         | 91; 100         | 76              | 396                   | 46         |

<sup>a</sup>  $T_g$  = glass transition temperature from the modulated DSC heating scan, <sup>b</sup>  $T_m$  = melting temperature from the second heating scan, <sup>c</sup>  $T_c$  = crystallization temperature from the cooling scan; <sup>d</sup>  $T_{d-max}$  = temperature at the maximum rate of decomposition; <sup>e</sup> The degree of crystallinity ( $\chi_c$ ) was calculated from WAXD

**Table S5.** Thermal and crystalline properties of the obtained P(2,5-FMF-co-2,5-DF)

| Method               | Solvent          | DSC             |                 |                 |                    |                 | TGA                   | WAXD       |
|----------------------|------------------|-----------------|-----------------|-----------------|--------------------|-----------------|-----------------------|------------|
|                      |                  | $T_g^a$<br>(°C) | $T_m^b$<br>(°C) | $T_m^c$<br>(°C) | $T_{cc}^c$<br>(°C) | $T_c^d$<br>(°C) | $T_{d-max}^e$<br>(°C) | $\chi_c^f$ |
| One-step             | <i>p</i> -cymene | -5              | 64; 99          | 80; 87; 98      | - <i>g</i>         | 63; 73          | 238; 390              | 37         |
|                      | (+)-limonene     | -5              | 59; 73; 91      | 72; 81; 92      | - <i>g</i>         | 50; 65          | 227; 390              | 35         |
|                      | Toluene          | -2              | 60; 101         | 84; 90; 101     | - <i>g</i>         | 64; 70          | 239; 393              | 35         |
| Two-step<br>600 mmHg | <i>p</i> -cymene | -1              | 60; 91; 101     | 87; 100         | - <i>g</i>         | 69              | 238; 393              | 37         |
|                      | (+)-limonene     | -2              | 58; 73; 88      | 71; 89          | 25                 | 46              | 232; 393              | 32         |
|                      | Toluene          | -3              | 55; 100         | 99              | 37                 | 53              | 239; 393              | 35         |
| Two-step<br>60 mmHg  | <i>p</i> -cymene | -1              | 57; 99          | 87; 100         | 35                 | 58              | 227; 391              | 37         |
|                      | (+)-limonene     | -3              | 69; 82          | 84              | - <i>g</i>         | 9               | 237; 393              | 30         |

<sup>a</sup>  $T_g$  = glass transition temperature from the modulated DSC heating scan, <sup>b</sup>  $T_m$  = melting temperature from the first heating scan, <sup>c</sup>  $T_m$  = melting temperature and  $T_{cc}$  = cold crystallization temperature from the second heating scan, <sup>d</sup>  $T_c$  = crystallization temperature from the cooling scan; <sup>e</sup>  $T_{d-max}$  = temperature at the maximum rate of decomposition; <sup>f</sup> The degree of crystallinity ( $\chi_c$ ) was calculated from WAXD; <sup>g</sup> not determined
